# Supplementary material for: Prediction of Adverse Outcomes in De Novo Hypertensive Disorders of Pregnancy: Development and Validation of Maternal and Neonatal Prognostic Models
Source: MDPI journal article supplement (doi:10.3390/healthcare10112307), 2022-11-18

## **Supplemental materials**

**Table S1.** Predictor variables considered in modeling.

**Table S2.** Univariate analyses of predictor variables ( $p \leq 0.1$ ) for adverse maternal outcomes.

**Table S3.** Univariate analyses of predictor variables ( $p \leq 0.1$ ) for adverse neonatal outcomes.

**Figure S1.** Machine learning methods screened for modeling adverse maternal outcomes

**Figure S2.** Features selected by the random forest method (highest AUC)

**Figure S3.** Machine learning methods screened for modeling adverse neonatal outcomes

**Figure S4.** Features selected by the boosted tree method (highest AUC)

**Figure S5.** Backward feature elimination of the random forest model for adverse maternal outcome

**Figure S6.** Backward feature elimination of the boosted tree model for adverse neonatal outcomes

**Table S1. Predictor variables (base) considered in modeling**

|                                                                                       |                                                  |
|---------------------------------------------------------------------------------------|--------------------------------------------------|
| <b>Demographic characteristics</b>                                                    | Thrombin time (sec)                              |
| Maternal age at pregnancy (years)                                                     | Lymphocyte level (%)                             |
| BMI                                                                                   | Activated partial thromboplastin time (sec)      |
| Gestational age at the diagnosis of gestational hypertension or pre-eclampsia (weeks) | Triglyceride (mmol/L)                            |
| Gravidity (n)                                                                         | Blood white blood cell count ( $\times 10^9/L$ ) |
| Parity (n)                                                                            | Monocyte ratio (%)                               |
|                                                                                       | Basophils ratio (%)                              |
| <b>Past medical history</b>                                                           | Carbon dioxide combining power (mmol/L)          |
| Previous gestational hypertension (y/n)                                               | Serum chlorine (mmol/L)                          |
| Chronic hypertension (y/n)                                                            | Serum calcium (mmol/L)                           |
| Previous gestational diabetes mellitus (y/n)                                          | Serum sodium (mmol/L)                            |
| Chronic diabetes mellitus (y/n)                                                       | Serum potassium (mmol/L)                         |
| Renal disease (y/n)                                                                   | Serum phosphorus (mmol/L)                        |
| <b>Symptoms</b>                                                                       | <b>Renal tests</b>                               |
| Nausea or vomiting (y/n)                                                              | 24 h urine protein (mg/24 h)                     |
| Frontal headache (y/n)                                                                | Creatine ( $\mu\text{mol/L}$ )                   |
| Visual disturbance (y/n)                                                              | Uric acid ( $\mu\text{mol/L}$ )                  |
| Chest pain or dyspnea (y/n)                                                           | Urobilinogen ( $\mu\text{mol/L}$ )               |
| <b>Cardiorespiratory signs</b>                                                        | Glucose in urine (mmol/L)                        |
| Diastolic blood pressure (mm Hg)                                                      | Urine white blood cell count (Leu/uL)            |
| Systolic blood pressure (mm Hg)                                                       | Urine specific gravity                           |
| Mean arterial pressure (mm Hg)                                                        | Nitrites in urine (+/-)                          |
| Hydroxybutyrate dehydrogenase (U/L)                                                   | <b>Hepatic tests</b>                             |
| Creatine kinase (U/L)                                                                 | Lactate dehydrogenase (U/L)                      |
| Creatine kinase isoenzymes (U/L)                                                      | Aspartate transaminase (U/L)                     |
| <b>Hematological tests</b>                                                            | Alanine transaminase (U/L)                       |
| Plateletcrit (%)                                                                      | Gamma-glutamyl transferase (U/L)                 |
| Platelet count ( $\times 10^9/L$ )                                                    | Total bile acid ( $\mu\text{mol/L}$ )            |
| Prothrombin time (sec)                                                                | Bilirubin ( $\mu\text{mol/L}$ )                  |
| Mean corpuscular hemoglobin (pg)                                                      | <b>Fetal assessments</b>                         |
| Blood urea nitrogen (mmol/L)                                                          | Abdominal circumference (cm)                     |
| Globulin (g/L)                                                                        | Head circumference (cm)                          |
| Fibrinogen (g/L)                                                                      | Biparietal diameter (cm)                         |
| Mean corpuscular hemoglobin concentration (g/L)                                       | Femur length (cm)                                |
| Platelet-large cell ratio (%)                                                         | Resistance index                                 |
| Mean platelet volume (fL)                                                             | Pulsatility index                                |
| Platelet distribution width (fL)                                                      | Umbilical artery flow                            |

**Table S2. Univariate analyses of predictor variables ( $p \leq 0.1$ ) for adverse maternal outcomes.**

|                                                      | OR (95% CI)      | p value |
|------------------------------------------------------|------------------|---------|
| <b>Demographic characteristics</b>                   |                  |         |
| Maternal age at pregnancy (years)                    | 1.08 (1.03-1.13) | <0.001  |
| Gestational age at the diagnosis of GH or PE (weeks) | 0.87 (0.84-0.91) | <0.001  |
| <b>Symptoms</b>                                      |                  |         |
| Nausea or vomiting (y/n)                             | 1.48 (0.91-2.31) | 0.1     |
| Chest pain or dyspnea (y/n)                          | 2.65 (0.89-6.36) | 0.048   |
| <b>Cardiorespiratory signs</b>                       |                  |         |
| Hydroxybutyrate dehydrogenase (U/L)                  | 1.00 (1.00-1.01) | <0.001  |
| <b>Hematological tests</b>                           |                  |         |
| Plateletcrit (%)                                     | 1.00 (1.00-1.01) | <0.001  |
| Platelet count ( $\times 10^9/L$ )                   | 0.98 (0.98-0.99) | <0.001  |
| Prothrombin time (sec)                               | 0.45 (0.32-0.62) | <0.001  |
| Mean corpuscular hemoglobin (pg)                     | 1.32 (1.18-1.46) | <0.001  |
| Blood urea nitrogen (mmol/L)                         | 1.03 (1.02-1.04) | <0.001  |
| Fibrinogen (g/L)                                     | 0.54 (0.40-0.74) | <0.001  |
| Mean corpuscular hemoglobin concentration (g/L)      | 1.04 (1.02-1.06) | <0.001  |
| Mean platelet volume (fL)                            | 1.46 (1.24-1.72) | <0.001  |
| Platelet-large cell ratio (%)                        | 1.06 (1.03-1.08) | <0.001  |
| Platelet distribution width (fL)                     | 1.14 (1.05-1.25) | 0.003   |
| Thrombin time (sec)                                  | 1.08 (1.01-1.16) | 0.022   |
| Lymphocyte level (%)                                 | 1.05 (1.02-1.08) | 0.002   |
| Triglyceride (mmol/L)                                | 0.90 (0.80-1.01) | 0.1     |
| <b>Renal tests</b>                                   |                  |         |
| 24 h urine protein (mg/24 h)                         | 1.00 (1.00-1.00) | <0.001  |
| Creatine ( $\mu\text{mol/L}$ )                       | 1.01 (1.00-1.02) | <0.001  |
| Uric acid ( $\mu\text{mol/L}$ )                      | 1.00 (1.00-1.00) | <0.001  |

**Hepatic tests**

|                                  |                  |        |
|----------------------------------|------------------|--------|
| Lactate dehydrogenase (U/L)      | 1.00 (1.00-1.01) | <0.001 |
| Aspartate transaminase (U/L)     | 1.03 (1.02-1.04) | <0.001 |
| Alanine transaminase (U/L)       | 1.03 (1.02-1.04) | <0.001 |
| Gamma-glutamyl transferase (U/L) | 1.01 (1.00-1.02) | 0.008  |
| Total bile acid (umol/L)         | 1.04 (1.02-1.07) | <0.001 |

**Fetal assessments**

|                              |                  |        |
|------------------------------|------------------|--------|
| Abdominal circumference (cm) | 0.86 (0.83-0.90) | <0.001 |
| Head circumference (cm)      | 1.01 (1.00-1.02) | 0.089  |
| Biparietal diameter (cm)     | 0.59 (0.49-0.70) | <0.001 |
| Femur length (cm)            | 0.53 (0.43-0.65) | <0.001 |
| Resistance index             | 964 (42.0-22813) | <0.001 |
| Umbilical artery flow        | 2.35 (1.65-3.28) | <0.001 |

---

OR = Odds Ratio, CI = Confidence Interval

**Table S3. Univariate analyses of predictor variables ( $p \leq 0.1$ ) for adverse neonatal outcomes.**

|                                                      | OR (95% CI)      | p value |
|------------------------------------------------------|------------------|---------|
| <b>Demographic characteristics</b>                   |                  |         |
| Maternal age at pregnancy (years)                    | 1.06 (1.03-1.09) | <0.001  |
| Gestational age at the diagnosis of GH or PE (weeks) | 0.78 (0.75-0.81) | <0.001  |
| <b>Symptoms</b>                                      |                  |         |
| Frontal headache (y/n)                               | 2.97 (2.09-4.19) | <0.001  |
| Chest pain or dyspnea (y/n)                          | 4.21 (2.17-8.06) | <0.001  |
| <b>Cardiorespiratory signs</b>                       |                  |         |
| Hydroxybutyrate dehydrogenase (U/L)                  | 1.01 (1.00-1.01) | <0.001  |
| Creatine kinase (U/L)                                | 1.00 (1.00-1.00) | <0.045  |
| Creatine kinase isoenzymes (U/L)                     | 1.00 (1.00-1.01) | 0.029   |
| <b>Hematological tests</b>                           |                  |         |
| Plateletcrit (%)                                     | 0.11 (0.01-1.34) | 0.086   |
| Platelet count ( $\times 10^9/L$ )                   | 1.00 (1.00-1.00) | 0.082   |
| Prothrombin time (sec)                               | 0.61 (0.50-0.73) | <0.001  |
| Mean corpuscular hemoglobin (pg)                     | 1.19 (1.12-1.27) | <0.001  |
| Blood urea nitrogen (mmol/L)                         | 1.29 (1.21-1.37) | <0.001  |
| Fibrinogen (g/L)                                     | 0.55 (0.45-0.66) | <0.001  |
| Mean corpuscular hemoglobin concentration (g/L)      | 1.04 (1.02-1.05) | <0.001  |
| Platelet distribution width (fL)                     | 0.81 (0.71-0.91) | <0.001  |
| Thrombin time (sec)                                  | 1.12 (1.07-1.17) | <0.001  |
| Activated partial thromboplastin time (sec)          | 1.08 (1.03-1.14) | 0.001   |
| Serum chlorine (mmol/L)                              | 1.00 (1.00-1.01) | 0.003   |
| Serum potassium (mmol/L)                             | 1.11 (1.04-1.19) | 0.002   |
| <b>Renal tests</b>                                   |                  |         |
| 24 h urine protein (mg/24 h)                         | 1.00 (1.00-1.00) | <0.001  |
| Creatine ( $\mu\text{mol/L}$ )                       | 1.01 (1.01-1.02) | <0.001  |

|                    |                  |        |
|--------------------|------------------|--------|
| Uric acid (umol/L) | 1.00 (1.00-1.00) | <0.001 |
|--------------------|------------------|--------|

**Hepatic tests**

|                                  |                  |        |
|----------------------------------|------------------|--------|
| Lactate dehydrogenase (U/L)      | 1.01 (1.00-1.01) | <0.001 |
| Aspartate transaminase (U/L)     | 1.03 (1.02-1.04) | <0.001 |
| Alanine transaminase (U/L)       | 1.03 (1.02-1.04) | <0.001 |
| Gamma-glutamyl transferase (U/L) | 1.02 (1.01-1.02) | <0.001 |
| Total bile acid (umol/L)         | 1.11 (1.08-1.14) | <0.001 |

**Fetal assessments**

|                          |                  |        |
|--------------------------|------------------|--------|
| Head circumference (cm)  | 0.92 (0.89-0.95) | <0.001 |
| Biparietal diameter (cm) | 0.37 (0.33-0.42) | <0.001 |
| Femur length (cm)        | 0.28 (0.23-0.32) | <0.001 |
| Umbilical artery flow    | 4.95 (3.74-6.64) | <0.001 |

---

OR = Odds Ratio, CI = Confidence Interval

**Figure S1. Machine learning methods screened for modeling adverse maternal outcomes**

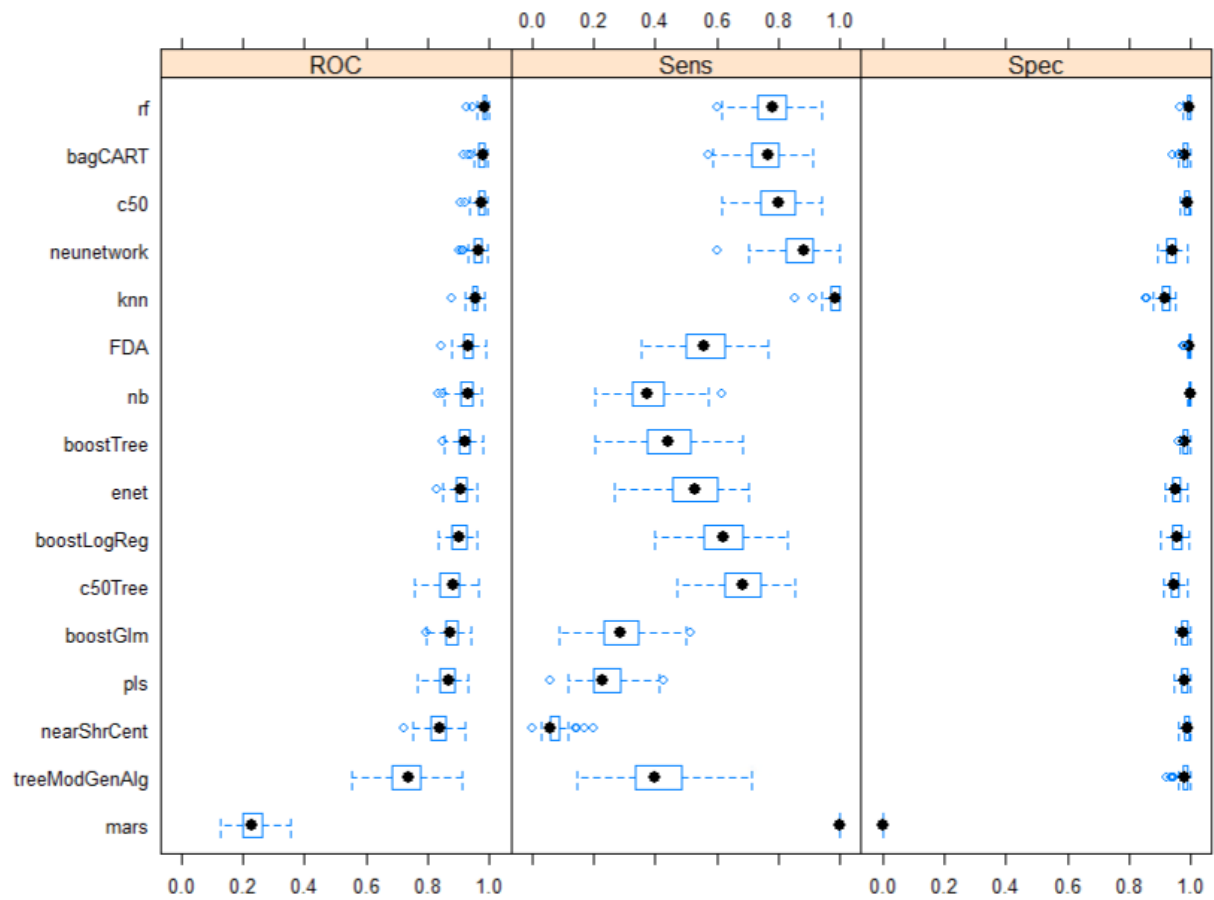

**Figure S2. Features selected by the random forest method (highest AUC)**

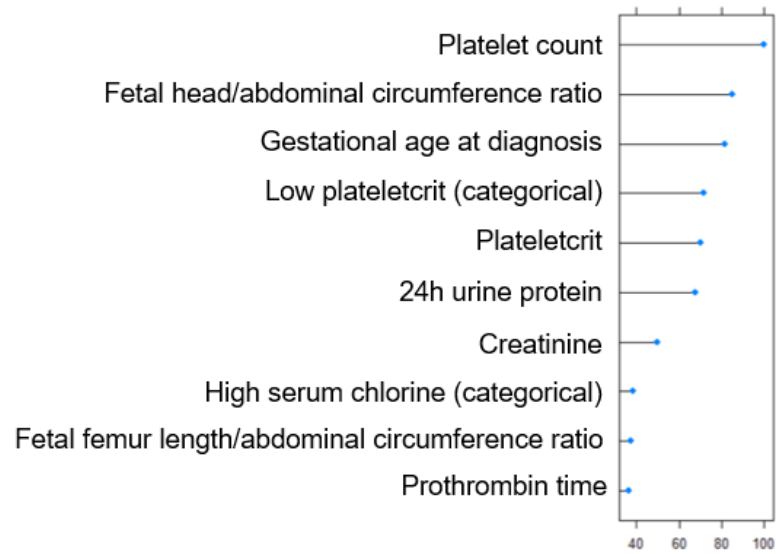



Figure S3. Machine learning methods screened for modeling adverse neonatal outcomes

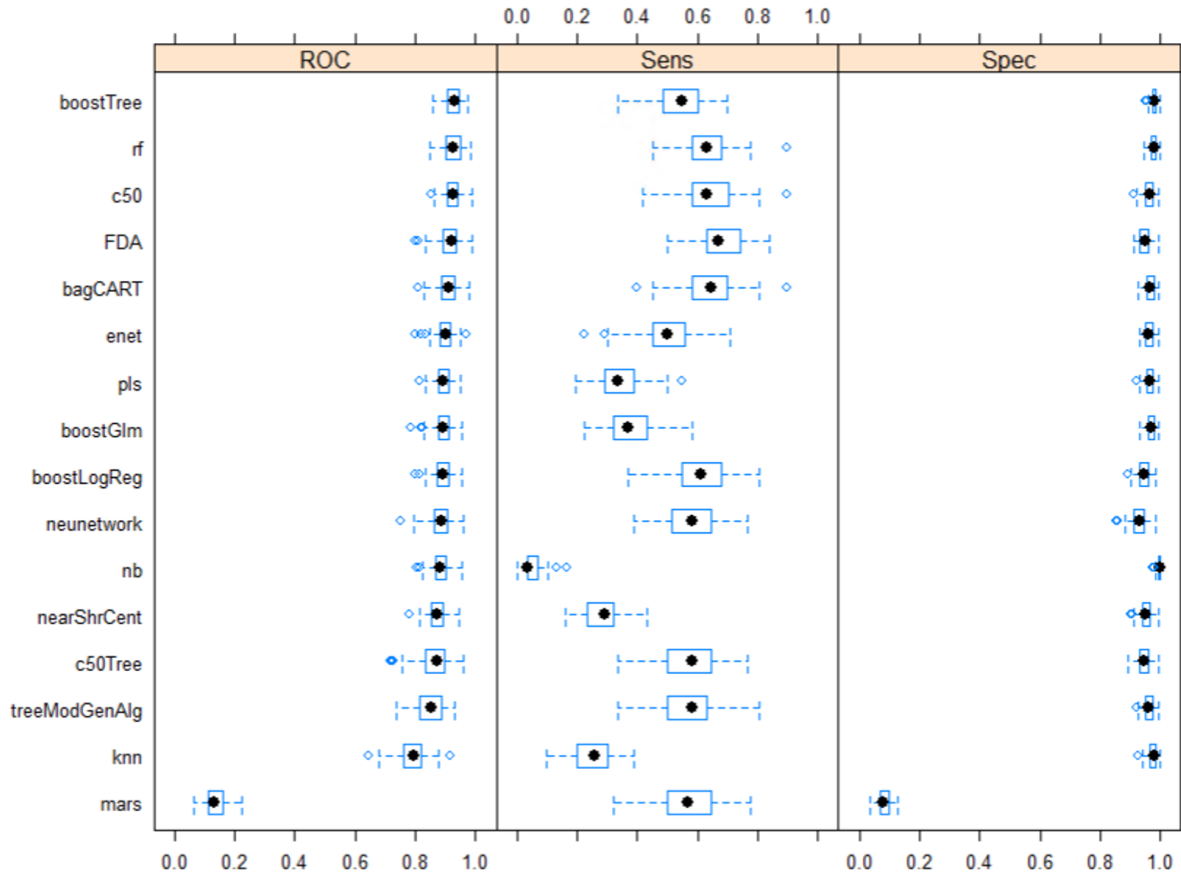

**Figure S4. Features selected by the boosted tree method (highest AUC)**

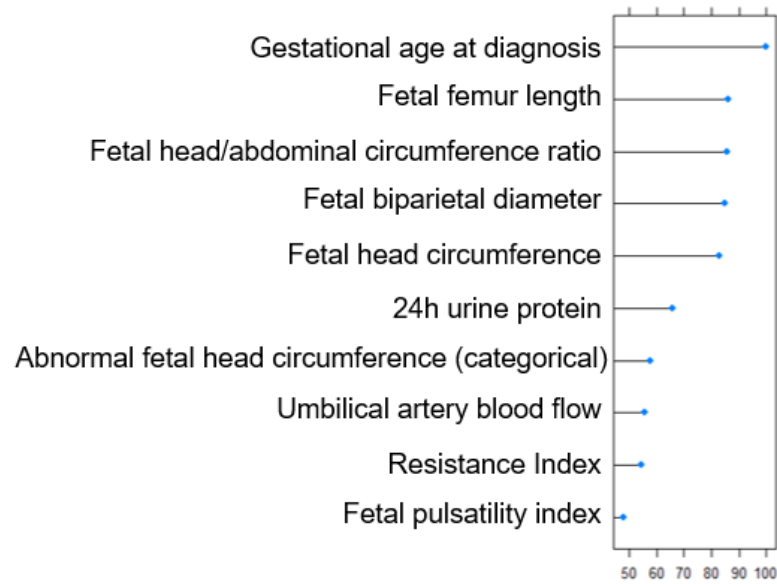

Figure S5. Backward feature elimination of the random forest model for adverse maternal outcome

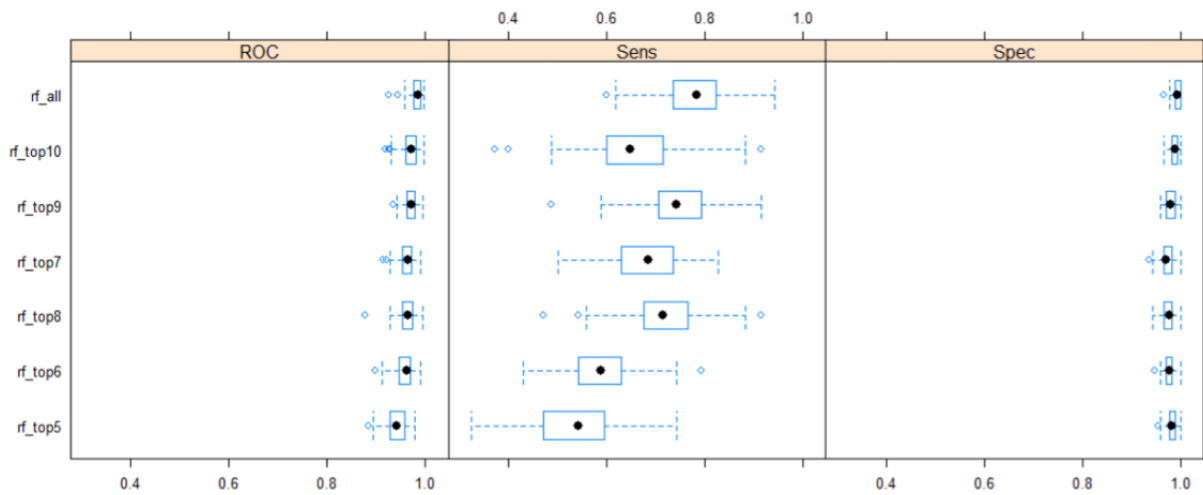

Figure S6. Backward feature elimination of the boosted tree model for adverse neonatal outcomes

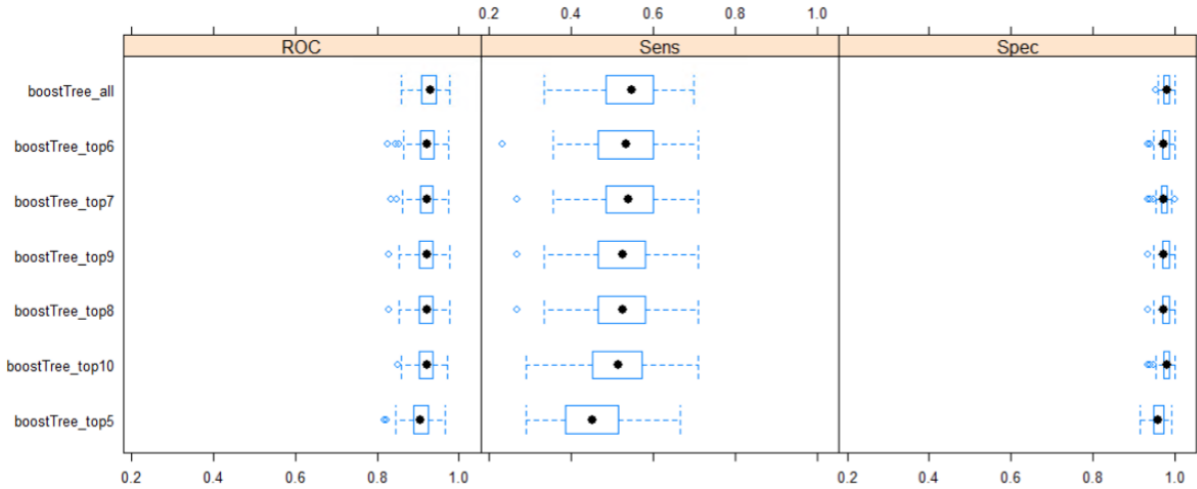

Supplement: s1 [file s1]
